# Supplementary material for: Portable X-ray Fluorescence (pXRF) as a Tool for Environmental Characterisation and Management of Mining Wastes: Benefits and Limits
Source: MDPI journal article supplement (doi:10.3390/app122312189), 2022-11-28
Supplement: s1 [file s1]

**Table S1 – Comparison of the accuracy of ICP-MS, DMA-80 and pXRF analysis. ICP-MS: As, Cr, Cu, Fe, Mn, Pb, Sb, Zn; DMA-80: Hg.**

| CRM    |                                            | As   | Cr   | Cu   | Fe    | Hg   | Mn   | Pb   | Sb   | Zn   |
|--------|--------------------------------------------|------|------|------|-------|------|------|------|------|------|
| PACS-3 | CRM concentration (mg/kg)                  | 30.3 | 90.6 | 356  | 41060 | 2.98 | 432  | 188  | 14.7 | 376  |
|        | pXRF average recovery (%)                  | 164% | 120% | 104% | 107%  |      | 107% | 93%  |      | 109% |
|        | Confirmatory analysis average recovery (%) | 98%  | 96%  | 83%  | 95%   | 102% | 93%  | 95%  | 99%  | 96%  |
| MESS-4 | CRM concentration (mg/kg)                  | 21.7 | 94.3 | 32.9 | 37900 | 0.09 | 298  | 21.5 | 1.07 | 147  |
|        | pXRF average recovery (%)                  | 121% | 106% | 160% | 102%  |      | 103% | 93%  |      | 102% |
|        | Confirmatory analysis average recovery (%) | 91%  | 98%  | 87%  | 89%   | 96%  | 91%  | 101% | 85%  | 94%  |

**Table S2 - Linear regression and t-test carried out on log<sub>10</sub> transformed data.**

| Matrix type | Element           | Preparation       | Data quality <sup>a</sup> | n  | RSD%   | r <sup>2</sup> | T-test  | Slope z-test | Y-int z-test |
|-------------|-------------------|-------------------|---------------------------|----|--------|----------------|---------|--------------|--------------|
|             |                   |                   |                           |    |        |                | p-value |              |              |
| Cu-Sb       | As                | Lab-prepared      | Quantitative              | 37 | 7%     | 0.963*         | 0.000   | 0.527        | 0.185        |
|             |                   | Fast lab-prepared | Quantitative              | 37 | 7%     | 0.917*         | 0.000   | 0.485        | 0.149        |
|             | Cr                | Lab-prepared      | Qualitative               | 25 | 12%    | 0.523*         | 0.021   | 0.721        | 0.720        |
|             |                   | Fast lab-prepared | Qualitative               | 21 | 14%    | 0.249          | 0.282   | 0.610        | 0.531        |
|             | Cu                | Lab-prepared      | Quantitative              | 37 | 8%     | 0.979*         | 0.000   | 0.641        | 0.201        |
|             |                   | Fast lab-prepared | Quantitative              | 37 | 5%     | 0.963*         | 0.000   | 0.650        | 0.104        |
|             | Fe                | Lab-prepared      | Quantitative              | 37 | 1%     | 0.970*         | 0.000   | 0.731        | 0.410        |
|             |                   | Fast lab-prepared | Quantitative              | 37 | 1%     | 0.933*         | 0.000   | 0.079        | 0.000        |
|             | Hg                | Lab-prepared      | Quantitative              | 11 | 14%    | 0.959*         | 0.127   | 0.802        | 0.637        |
|             |                   | Fast lab-prepared | Quantitative              | 13 | 11%    | 0.885*         | 0.207   | 0.539        | 0.367        |
|             | Mn                | Lab-prepared      | Quantitative              | 37 | 3%     | 0.929*         | 0.004   | 0.605        | 0.458        |
|             |                   | Fast lab-prepared | Quantitative              | 37 | 4%     | 0.875*         | 0.002   | 0.554        | 0.403        |
|             | Pb                | Lab-prepared      | Definitive                | 37 | 6%     | 0.988*         | 0.760   | 0.770        | 0.524        |
|             |                   | Fast lab-prepared | Definitive                | 37 | 5%     | 0.919*         | 0.066   | 0.867        | 0.920        |
|             | Sb                | Lab-prepared      | Definitive                | 15 | 9%     | 0.970*         | 0.576   | 0.704        | 0.589        |
|             |                   | Fast lab-prepared | Definitive                | 12 | 7%     | 0.940*         | 0.980   | 0.707        | 0.613        |
| Zn          | Lab-prepared      | Quantitative      | 37                        | 4% | 0.969* | 0.007          | 0.849   | 0.709        |              |
|             | Fast lab-prepared | Quantitative      | 37                        | 3% | 0.933* | 0.000          | 0.809   | 0.573        |              |
| Pb-Zn       | As                | Lab-prepared      | Quantitative              | 52 | 10%    | 0.856*         | 0.000   | 0.383        | 0.051        |
|             |                   | Fast lab-prepared | Qualitative               | 52 | 12%    | 0.699*         | 0.001   | 0.371        | 0.096        |
|             | Cr                | Lab-prepared      | Qualitative               | 5  | 7%     | 0.100          | 0.007   | 0.035        | 0.000        |
|             |                   | Fast lab-prepared | Qualitative               | 5  | 8%     | 0.079          | 0.024   | 0.100        | 0.007        |
|             | Cu                | Lab-prepared      | Qualitative               | 34 | 16%    | 0.358*         | 0.000   | 0.024        | 0.001        |
|             |                   | Fast lab-prepared | Qualitative               | 43 | 17%    | 0.233          | 0.000   | 0.016        | 0.000        |
|             | Fe                | Lab-prepared      | Quantitative              | 53 | 1%     | 0.952*         | 0.000   | 0.201        | 0.003        |
|             |                   | Fast lab-prepared | Quantitative              | 51 | 3%     | 0.874*         | 0.000   | 0.158        | 0.002        |
|             | Hg                | Lab-prepared      | Qualitative               | 7  | 11%    | 0.050          | 0.000   | 0.537        | 0.017        |
|             |                   | Fast lab-prepared | Qualitative               | 6  | 9%     | 0.001          | 0.000   | 0.381        | 0.104        |
|             | Mn                | Lab-prepared      | Quantitative              | 57 | 7%     | 0.895*         | 0.003   | 0.917        | 0.747        |
|             |                   | Fast lab-prepared | Quantitative              | 49 | 12%    | 0.806*         | 0.233   | 0.799        | 0.646        |
|             | Pb                | Lab-prepared      | Definitive                | 58 | 5%     | 0.993*         | 0.370   | 0.789        | 0.718        |
|             |                   | Fast lab-prepared | Quantitative              | 55 | 5%     | 0.907*         | 0.013   | 0.620        | 0.622        |
|             | Sb                | Lab-prepared      | Qualitative               | 2  | n.d.   | n.d.           | n.d.    | n.d.         | n.d.         |
|             |                   | Fast lab-prepared | Qualitative               | 2  | n.d.   | n.d.           | n.d.    | n.d.         | n.d.         |
| Zn          | Lab-prepared      | Definitive        | 58                        | 4% | 0.992* | 0.053          | 0.887   | 0.711        |              |
|             | Fast lab-prepared | Definitive        | 56                        | 5% | 0.910* | 0.508          | 0.591   | 0.422        |              |

<sup>a</sup> Data quality levels are defined by US EPA [10]

\* Significant for p < 0.001
